# Supplementary material for: Analytical Performance and Concordance with Next-Generation Sequencing of a Rapid, Multiplexed dPCR Panel for the Detection of DNA and RNA Biomarkers in Non-Small-Cell Lung Cancer
Source: MDPI journal article supplement (doi:10.3390/diagnostics13213299), 2023-10-25
Supplement: s1 [file s1]

Supplementary Materials:

Table S2. FFPE Sample Details.

| Sample ID | Oncomine Result                   | Tissue sampling method | Nucleated Cells per slide | Tissue Surface Area (mm2) | Tumor percent | Age     | Gender |
|-----------|-----------------------------------|------------------------|---------------------------|---------------------------|---------------|---------|--------|
| C101101   | ALK Fusion                        | Lung                   | 35714                     | 75                        | 70            | 71      | M      |
| C101114   | NTRK Fusion                       | Lung                   | 83333                     | 150                       | 90            | 66      | M      |
| C408258   | EGFR exon 19 Deletion             | Lung                   | 13333                     | 55                        | 90            | 59      | M      |
| C408259   | EGFR exon 19 Deletion             | Lung                   | 30000                     | 150                       | 100           | 66      | M      |
| C702031   | EGFR T790M                        | Lung                   | 25000                     | 105                       | 100           | 73      | F      |
| C702035   | EGFR L858R                        | Lung                   | 26316                     | 110                       | 95            | 65      | M      |
| C702040   | KRAS G12C                         | Lung                   | 10000                     | 54                        | 100           | 54      | M      |
| XX407334  | EGFR exon 19 Deletion, KRAS G12C  | Lung                   | 1000                      | 70                        | 35            | 72      | M      |
| XX411434  | KRAS G12C                         | Lung                   | >5000                     | 143                       | 95            | 68      | M      |
| XX532429  | MET exon14 skipping               | Lung                   | 1000                      | 36                        | 75            | 72      | F      |
| XX662727  | EGFR exon 19 Deletion, EGFR T790M | Lung                   | >5000                     | 77                        | 70            | 64      | F      |
| XX662730  | ERBB2 exon 20 Insertion           | Lung                   | 3000                      | 60                        | 50            | 60      | F      |
| XX662731  | ERBB2 exon 20 Insertion           | Lung                   | 1000                      | 40                        | 60            | 55      | M      |
| XX662733  | EGFR L858R, MET exon14 skipping   | Lung                   | 2500                      | 48                        | 50            | 68      | F      |
| XX662757  | EGFR T790M, EGFR L858R            | Lung                   | 3000                      | 80                        | 80            | 61      | M      |
| XX662765  | ERBB2 exon 20 Insertion           | Lung                   | 1500                      | 77                        | 30            | 66      | M      |
| XX666465  | EGFR G719X                        | Lung                   | UNKNOWN                   | UNKNOWN                   |               | 71      | M      |
| XX668154  | BRAF V600E                        | Lung                   | >7500                     | 63                        | 95            | 75      | F      |
| XX702673  | ERBB2 exon 20 Insertion           | Lung                   | 3000                      | 84                        | 60            | 64      | M      |
| XX702713  | ERBB2 exon 20 Insertion           | Lung                   | UNKNOWN                   | UNKNOWN                   | 30            | 69      | F      |
| XX704234  | BRAF V600E                        | Lung                   | 1500                      | 100                       | 70            | 67      | M      |
| XX706083  | EGFR S768I, EGFR L858R            | Lung                   | >5000                     | 220                       | 80            | 41      | F      |
| XX739460  | EGFR exon 20 Insertion            | Lung                   | UNKNOWN                   | UNKNOWN                   |               | 35      | M      |
| XX739464  | ROS Fusion                        | Lung                   | >5000                     | 72                        | 80            | 69      | M      |
| XX739467  | EGFR exon 20 Insertion            | Lung                   | UNKNOWN                   | UNKNOWN                   |               | 35      | M      |
| XX739485  | ROS Fusion                        | Lung                   | >5000                     | 48                        | 80            | 54      | F      |
| XX739596  | RET Fusion                        | Lung                   | >5000                     | 30                        | 95            | UNKNOWN | M      |

|          |                                          |      |         |         |     |    |   |
|----------|------------------------------------------|------|---------|---------|-----|----|---|
| XX739627 | EGFR exon 20<br>Insertion                | Lung | UNKNOWN | UNKNOWN |     | 44 | F |
| XX739629 | ERBB2 exon 20<br>Insertion               | Lung | >5000   | 78      | 85  | 62 | F |
| XX740118 | EGFR exon 20<br>Insertion, RET<br>Fusion | Lung | UNKNOWN | UNKNOWN |     | 60 | F |
| XX885918 | RET Fusion                               | Lung | 2000    | 81      | 45  | 73 | M |
| XX927071 | ALK Fusion, RET<br>Fusion                | Lung | 2500    | 117     | 35  | 65 | M |
| XY123837 | EGFR exon 20<br>Insertion                | Lung | 2500    | 72      | 80  | 66 | M |
| XY123841 | ROS Fusion                               | Lung | 2500    | 98      | 50  | 63 | M |
| XY124711 | ALK Fusion                               | Lung | >5000   | 162     | 60  | 58 | M |
| XY124734 | ALK Fusion                               | Lung | 3500    | 160     | 50  | 65 | M |
| XY124735 | ROS Fusion                               | Lung | 2000    | 75      | 50  | 58 | M |
| XY125737 | EGFR L858R                               | Lung | UNKNOWN | UNKNOWN |     | 51 | F |
| XY125739 | ALK Fusion                               | Lung | 3500    | 120     | 80  | 65 | M |
| XY125745 | EGFR L858R                               | Lung | 2500    | 45      | 80  | 74 | M |
| XY125888 | MET exon14<br>skipping                   | Lung | UNKNOWN | UNKNOWN |     | 47 | M |
| XY125894 | EGFR T790M,<br>EGFR L858R                | Lung | 2500    | 72      | 50  | 69 | M |
| XY125903 | ERBB2 Insertion                          | Lung | 2500    | 119     | 65  | 62 | M |
| XY166082 | ERBB2 Insertion                          | Lung | 2500    | 72      | 70  | 68 | F |
| XY204535 | RET Fusion                               | Lung | 2500    | 78      | 50  | 70 | F |
| XY214570 | NTRK Fusion                              | Lung | 1500    | 114     | 40  | 58 | M |
| XY214595 | NTRK Fusion                              | Lung | >5000   | 45      | 90  | 77 | F |
| XY214643 | EGFR S768I                               | Lung | >5000   | 85      | 85  | 67 | F |
| XY214643 | EGFR G719X                               | Lung | >5000   | 85      | 85  | 67 | F |
| XY215016 | KRAS G12C,<br>NTRK Fusion                | Lung | 3500    | 55      | 75  | 68 | M |
| XY215386 | BRAF V600E                               | Lung | >5000   | 110     | 85  | 77 | M |
| XY215673 | EGFR exon 19<br>Deletion                 | Lung | >5000   | 104     | 75  | 82 | F |
| XY215683 | RET Fusion                               | Lung | 3500    | 99      | 85  | 87 | M |
| XY243852 | EGFR L861Q                               | Lung | UNKNOWN | UNKNOWN |     | 83 | F |
| XY244180 | EGFR exon 19<br>Deletion                 | Lung | 2500    | 42      | 55  | 67 | M |
| XY244238 | ERBB2 Insertion                          | Lung | 2500    | 30      | 50  | 67 | F |
| XY244272 | MET exon14<br>skipping                   | Lung | 2500    | 91      | 65  | 66 | M |
| XY244535 | BRAF V600E                               | Lung | 2500    | 160     | 50  | 33 | F |
| XY244549 | BRAF V600E                               | Lung | >5000   | 99      | 80  | 47 | M |
| XY244553 | BRAF V600E                               | Lung | >3000   | 120     | 90  | 49 | M |
| XY244557 | BRAF V600E                               | Lung | >7500   | 88      | 95  | 52 | F |
| XY244565 | BRAF V600E                               | Lung | >10000  | 112     | 100 | 53 | M |
| XY244569 | BRAF V600E                               | Lung | >5000   | 108     | 90  | 54 | M |
| XY244572 | ALK Fusion                               | Lung | UNKNOWN | UNKNOWN |     | 55 | M |
| XY244580 | ALK Fusion                               | Lung | UNKNOWN | UNKNOWN |     | 56 | M |
| XY244590 | EGFR exon 20<br>Insertion                | Lung | >5001   | 72      | 85  | 58 | M |

|          |                                         |      |         |         |    |    |   |
|----------|-----------------------------------------|------|---------|---------|----|----|---|
| XY244636 | <i>BRAF</i> V600E                       | Lung | >5000   | 77      | 90 | 66 | M |
| XY245166 | <i>ALK</i> Fusion                       | Lung | UNKNOWN | UNKNOWN |    | 61 | M |
| XY245180 | <i>EGFR</i> T790M,<br><i>EGFR</i> L858R | Lung | 3500    | 24      | 50 | 66 | M |
| XY245225 | <i>ALK</i> Fusion                       | Lung | 3500    | 66      | 65 | 67 | F |
| XY245233 | <i>ERBB2</i> Insertion                  | Lung | >5001   | 89      | 80 | 69 | F |
| XY245263 | <i>EGFR</i> exon 20<br>Insertion        | Lung | 3500    | 63      | 85 | 58 | M |
| XY245278 | <i>MET</i> exon14<br>skipping           | Lung | 3500    | 91      | 65 | 59 | F |
| XY365121 | <i>EGFR</i> S768I,<br><i>EGFR</i> G719X | Lung | 3000    | 150     | 80 | 56 | M |
| XY365134 | <i>EGFR</i> exon 20<br>Insertion        | Lung | UNKNOWN | UNKNOWN |    | 62 | M |
| XY365143 | <i>EGFR</i> exon 20<br>Insertion        | Lung | 3000    | 100     | 60 | 59 | M |
| XX662720 | <i>EGFR</i> T790M                       | Lung | UNKNOWN | UNKNOWN |    | 63 | M |

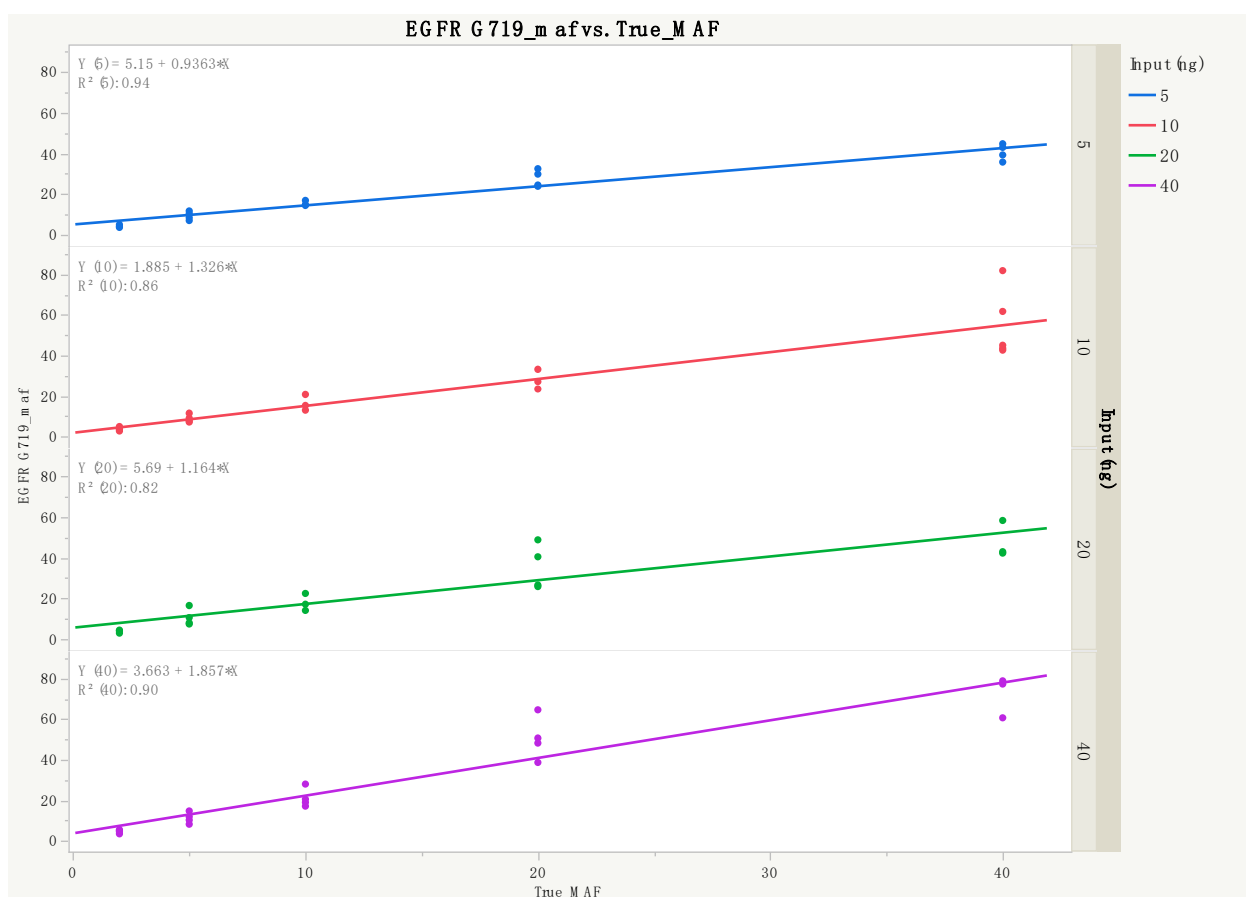

**Figure S1: Known MAF vs estimated MAF at varying input.** *EGFR* G719S was spiked in at 2, 5, 10, 20, and 40% known MAF (True\_MAF) and plotted against the estimated MAF reported out by ChromaCode Cloud (*EGFR* G719\_maf) at 5 ng, 10 ng, 20 ng, and 40 ng total DNA input. Input amount is defined in ng for each well as measured by Qubit. (n = 4 for all MAF/input combinations except 40% known MAF at 40 ng which n = 3)

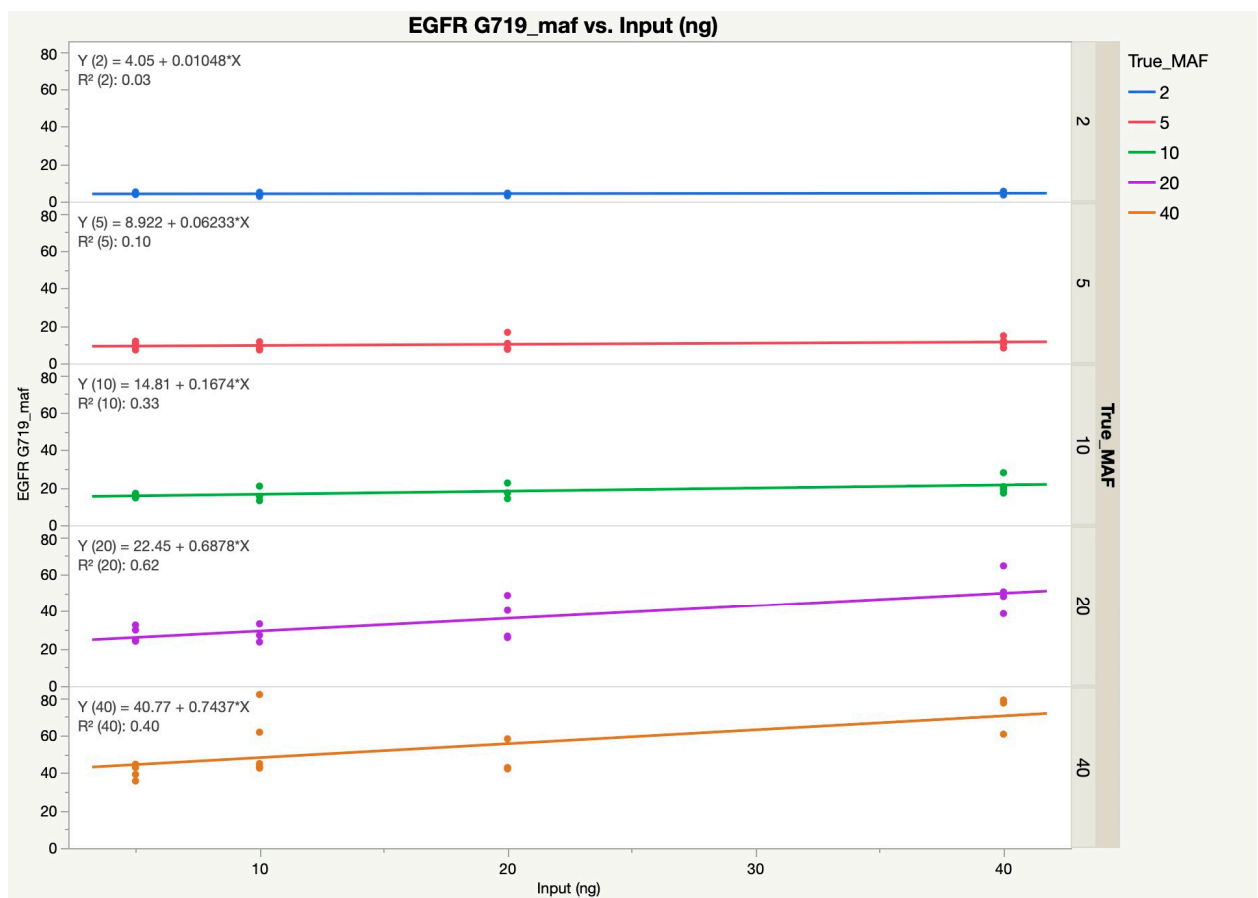

**Figure S2: Estimated MAF vs input (ng) at varying known MAF.** ChromaCode Cloud estimated MAF (EGFR G719\_maf) was plotted against input (ng) for each known MAF. Input amount is defined in ng for each well as measured by Qubit. (n = 4 for all MAF/input combinations except 40% known MAF at 40 ng which n = 3)

**Table S3:** Parameters for In Silico Bioinformatic Analysis.

| DNA Variants              |                                                                                   |                                        |
|---------------------------|-----------------------------------------------------------------------------------|----------------------------------------|
| Variable                  | Input                                                                             |                                        |
| CosmicMutantExport.tsv.gz | Version                                                                           |                                        |
| v97                       | Download Date 08FEB2023                                                           |                                        |
| Primary site              | Lung                                                                              |                                        |
|                           | %in%c("adenocarcinoma",                                                           |                                        |
|                           | "non_small_cell_carcinoma",                                                       |                                        |
|                           | "squamous_cell_carcinoma",                                                        |                                        |
|                           | "large_cell_carcinoma",                                                           |                                        |
| Histology subtype         | "large_cell_neuroendocrine_carcinoma",                                            |                                        |
|                           | "bronchioloalveolar_adenocarcinoma",                                              |                                        |
|                           | "acinar_adenocarcinoma",                                                          |                                        |
|                           | "sarcomatoid_carcinoma")                                                          |                                        |
| GRCh                      | 38                                                                                |                                        |
| Mutation somatic status   | %in%c("Reported in another cancer sample as somatic","Confirmed somatic variant") |                                        |
| Filtering by Variant Type |                                                                                   |                                        |
| Variant Type              | Filter Column                                                                     | Input                                  |
|                           | HGNC ID                                                                           | 3236 (EGFR)                            |
|                           | Mutation CDS                                                                      | contains c.2185-c.2283                 |
| EGFR exon 19 deletion     | Mutation Description                                                              | contains "Deletion", ignore.case=TRUE  |
|                           | HGNC ID                                                                           | 3236 (EGFR)                            |
|                           | Mutation CDS                                                                      | contains c.2284-c.2469                 |
| EGFR exon 20 insertion    | Mutation Description                                                              | contains "Insertion", ignore.case=TRUE |
|                           | HGNC ID                                                                           | 3430 (ERBB2)                           |
|                           | Mutation CDS                                                                      | contains c.2308-c.2493                 |
|                           | Mutation Description                                                              | contains "Insertion", ignore.case=TRUE |
| ERBB2 exon 20 insertion   |                                                                                   |                                        |
| RNA Fusions               |                                                                                   |                                        |
| Variable                  | Input                                                                             |                                        |
| CosmicFusionExport.tsv.gz | Version                                                                           |                                        |
| v97                       | Download Date 08FEB2023                                                           |                                        |
| Primary site              | Lung                                                                              |                                        |

|                   |                                                                                                                                                                                                                                                           |
|-------------------|-----------------------------------------------------------------------------------------------------------------------------------------------------------------------------------------------------------------------------------------------------------|
| Histology subtype | %in%c("adenocarcinoma",<br>"non_small_cell_carcinoma",<br>"squamous_cell_carcinoma",<br>"large_cell_carcinoma",<br>"large_cell_neuroendocrine_carcinoma",<br>"bronchioloalveolar_adenocarcinoma",<br>"acinar_adenocarcinoma",<br>"sarcomatoid_carcinoma") |
|-------------------|-----------------------------------------------------------------------------------------------------------------------------------------------------------------------------------------------------------------------------------------------------------|

#### Filtering by Individual Fusion Type

| Fusion Type                                | Filter       | Input |
|--------------------------------------------|--------------|-------|
| ALK fusion subset of NSCLC fusion data     | 3'_GENE_NAME | ALK   |
| RET fusion subset of NSCLC fusion data     | 3'_GENE_NAME | RET   |
| ROS1 fusion subset of NSCLC fusion data    | 3'_GENE_NAME | ROS1  |
| NTRK1 fusion subset of CosmicFusionExport* | 3'_GENE_NAME | NTRK1 |
| NTRK2 fusion subset of CosmicFusionExport* | 3'_GENE_NAME | NTRK2 |
| NTRK3 fusion subset of CosmicFusionExport* | 3'_GENE_NAME | NTRK3 |

---

**Table S4:** Results of Empirical Analytical Inclusivity Testing by COSMIC ID for DNA and RNA targets.

|    | Target | Cosmic ID | Detected |
|----|--------|-----------|----------|
| 1  | ALK    | COSF1051  | 2/2      |
| 2  | ALK    | COSF1056  | 2/2      |
| 3  | ALK    | COSF1058  | 2/2      |
| 4  | ALK    | COSF1060  | 2/2      |
| 5  | ALK    | COSF1064  | 2/2      |
| 6  | ALK    | COSF1127  | 2/2      |
| 7  | ALK    | COSF1257  | 2/2      |
| 8  | ALK    | COSF1264  | 2/2      |
| 9  | ALK    | COSF1276  | 2/2      |
| 10 | ALK    | COSF1296  | 2/2      |
| 11 | ALK    | COSF1300  | 2/2      |
| 12 | ALK    | COSF1381  | 2/2      |
| 13 | ALK    | COSF1430  | 2/2      |
| 14 | ALK    | COSF1461  | 2/2      |
| 15 | ALK    | COSF1541  | 2/2      |
| 16 | ALK    | COSF1544  | 2/2      |
| 17 | ALK    | COSF1612  | 2/2      |
| 18 | ALK    | COSF1614  | 2/2      |
| 19 | ALK    | COSF1616  | 2/2      |
| 20 | ALK    | COSF1620  | 2/2      |
| 21 | ALK    | COSF1625  | 2/2      |
| 22 | ALK    | COSF1712  | 2/2      |
| 23 | ALK    | COSF409   | 2/2      |
| 24 | ALK    | COSF413   | 0/2      |
| 25 | ALK    | COSF415   | 2/2      |
| 26 | ALK    | COSF421   | 2/2      |
| 27 | ALK    | COSF424   | 2/2      |
| 28 | ALK    | COSF426   | 2/2      |
| 29 | ALK    | COSF428   | 2/2      |
| 30 | ALK    | COSF434   | 2/2      |
| 31 | ALK    | COSF437   | 2/2      |
| 32 | ALK    | COSF439   | 2/2      |
| 33 | ALK    | COSF441   | 2/2      |
| 34 | ALK    | COSF444   | 2/2      |
| 35 | ALK    | COSF459   | 2/2      |
| 36 | ALK    | COSF460   | 2/2      |
| 37 | ALK    | COSF469   | 2/2      |
| 38 | ALK    | COSF477   | 2/2      |
| 39 | ALK    | COSF478   | 2/2      |
| 40 | ALK    | COSF487   | 2/2      |
| 41 | ALK    | COSF732   | 2/2      |

|    |          |             |     |
|----|----------|-------------|-----|
| 42 | EGFR Del | COSM12370   | 2/2 |
| 43 | EGFR Del | COSM12382   | 2/2 |
| 44 | EGFR Del | COSM12383   | 2/2 |
| 45 | EGFR Del | COSM12384   | 2/2 |
| 46 | EGFR Del | COSM12422   | 2/2 |
| 47 | EGFR Del | COSM12678   | 2/2 |
| 48 | EGFR Del | COSM13556   | 2/2 |
| 49 | EGFR Del | COSM24267   | 0/2 |
| 50 | EGFR Del | COSM26038   | 2/2 |
| 51 | EGFR Del | COSM26704   | 0/2 |
| 52 | EGFR Del | COSM26718   | 2/2 |
| 53 | EGFR Del | COSM28517   | 2/2 |
| 54 | EGFR Del | COSM6218    | 2/2 |
| 55 | EGFR Del | COSM6225    | 2/2 |
| 56 | EGFR Del | COSM6255    | 2/2 |
| 57 | EGFR Del | COSM6256    | 2/2 |
| 58 | EGFR Ins | COSM12376   | 2/2 |
| 59 | EGFR Ins | COSM12378   | 2/2 |
| 60 | EGFR Ins | COSM12380   | 2/2 |
| 61 | EGFR Ins | COSM12381   | 2/2 |
| 62 | EGFR Ins | COSM12427   | 0/2 |
| 63 | EGFR Ins | COSM13428   | 2/2 |
| 64 | EGFR Ins | COSM18432   | 2/2 |
| 65 | EGFR Ins | COSM26720   | 0/2 |
| 66 | ERRB2    | COSM12552   | 2/2 |
| 67 | ERRB2    | COSM12553   | 0/2 |
| 68 | ERRB2    | COSM12558   | 2/2 |
| 69 | ERRB2    | COSM26681   | 2/2 |
| 70 | ERRB2    | COSM6438151 | 0/2 |
| 71 | G719X    | COSM6252    | 2/2 |
| 72 | G719X    | COSM6253    | 2/2 |
| 73 | NTRK     | COSF1323    | 2/2 |
| 74 | NTRK     | COSF1324    | 2/2 |
| 75 | NTRK     | COSF1326    | 2/2 |
| 76 | NTRK     | COSF1329    | 2/2 |
| 77 | NTRK     | COSF1446    | 2/2 |
| 78 | NTRK     | COSF1448    | 1/2 |
| 79 | NTRK     | COSF1534    | 2/2 |
| 80 | NTRK     | COSF1536    | 2/2 |
| 81 | NTRK     | COSF1653    | 2/2 |
| 82 | NTRK     | COSF823     | 2/2 |
| 83 | RET      | COSF1230    | 2/2 |
| 84 | RET      | COSF1232    | 2/2 |
| 85 | RET      | COSF1234    | 2/2 |



|     |      |          |     |
|-----|------|----------|-----|
| 86  | RET  | COSF1236 | 2/2 |
| 87  | RET  | COSF1253 | 2/2 |
| 88  | RET  | COSF1262 | 2/2 |
| 89  | RET  | COSF1340 | 2/2 |
| 90  | RET  | COSF1481 | 2/2 |
| 91  | RET  | COSF1491 | 2/2 |
| 92  | RET  | COSF1498 | 2/2 |
| 93  | RET  | COSF1503 | 2/2 |
| 94  | RET  | COSF1507 | 2/2 |
| 95  | RET  | COSF1509 | 2/2 |
| 96  | RET  | COSF1511 | 2/2 |
| 97  | RET  | COSF1513 | 2/2 |
| 98  | RET  | COSF1515 | 2/2 |
| 99  | RET  | COSF1519 | 2/2 |
| 100 | RET  | COSF1521 | 2/2 |
| 101 | RET  | COSF1525 | 2/2 |
| 102 | RET  | COSF1687 | 2/2 |
| 103 | ROS1 | COSF1139 | 2/2 |
| 104 | ROS1 | COSF1188 | 2/2 |
| 105 | ROS1 | COSF1196 | 2/2 |
| 106 | ROS1 | COSF1198 | 2/2 |
| 107 | ROS1 | COSF1198 | 2/2 |
| 108 | ROS1 | COSF1202 | 2/2 |
| 109 | ROS1 | COSF1259 | 2/2 |
| 110 | ROS1 | COSF1261 | 2/2 |
| 111 | ROS1 | COSF1265 | 2/2 |
| 112 | ROS1 | COSF1267 | 2/2 |
| 113 | ROS1 | COSF1269 | 2/2 |
| 114 | ROS1 | COSF1273 | 2/2 |
| 115 | ROS1 | COSF1278 | 2/2 |
| 116 | ROS1 | COSF1280 | 2/2 |
| 117 | ROS1 | COSF1478 | 2/2 |
| 118 | ROS1 | COSF1627 | 2/2 |
| 119 | ROS1 | COSF1631 | 2/2 |
| 120 | ROS1 | COSF1637 | 2/2 |
| 121 | ROS1 | COSF1639 | 2/2 |
| 122 | ROS1 | COSF1641 | 2/2 |
| 123 | ROS1 | COSF1643 | 2/2 |
| 124 | ROS1 | COSF1645 | 2/2 |
| 125 | ROS1 | COSF1647 | 2/2 |
| 126 | ROS1 | COSF1663 | 2/2 |
| 127 | ROS1 | COSF1671 | 2/2 |
| 128 | ROS1 | COSF1673 | 2/2 |

---

**Table S5:** Internal Control performance in clinical samples by sample source vendor.

| Vendor   | All Wells Pass | 1+ Well IC Failure | % with 1 Failure |
|----------|----------------|--------------------|------------------|
| Vendor A | 3              | 5                  | 63%              |
| Vendor B | 29             | 0                  | 0%               |
| Vendor C | 53             | 16                 | 23%              |

**Table S6:** Fusion partners for discordant resolution.

| ID   | Fusion Coordinates                                                                              |
|------|-------------------------------------------------------------------------------------------------|
| 1101 | chr2:299621113, chr2:29446553<br>chr2:29498458, chr2:29498378                                   |
| 1114 | chr18:45085964, chr1:156851219<br>chr17:9138266, chr9:156851219<br>chr17:9138266, chr9:87475930 |
| 3837 | chr6:117659858, chr6:117658503                                                                  |
| 5739 | chr1:156849914, chr1:156851249                                                                  |
| 4595 | chr9:87367700, chr9:87356807<br>chr9:87367000: chr9:87317074<br>chr9:87285856: chr9:87317138    |
| 7566 | chr6:117723136, chr6:117718279                                                                  |

**S3. 2-D plots of representative dPCR data generated during the Analytical Sensitivity study.**

**Figure S3A.** T790M positive partitions (green), Internal Control (hgDNA) positive partitions (blue), along with calibrator and negative partitions.

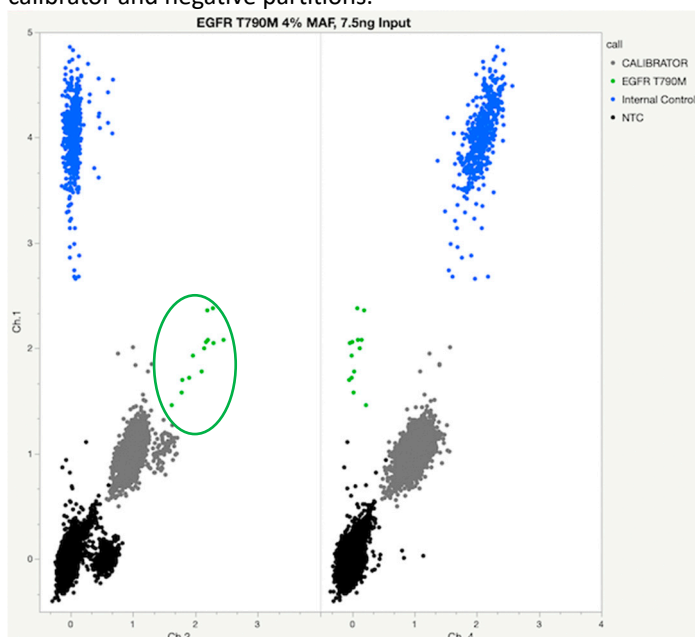

**Figure S3B.** ROS1 positive partitions (green), Internal Control (hgRNA) positive partitions (blue), along with calibrator and negative partitions.

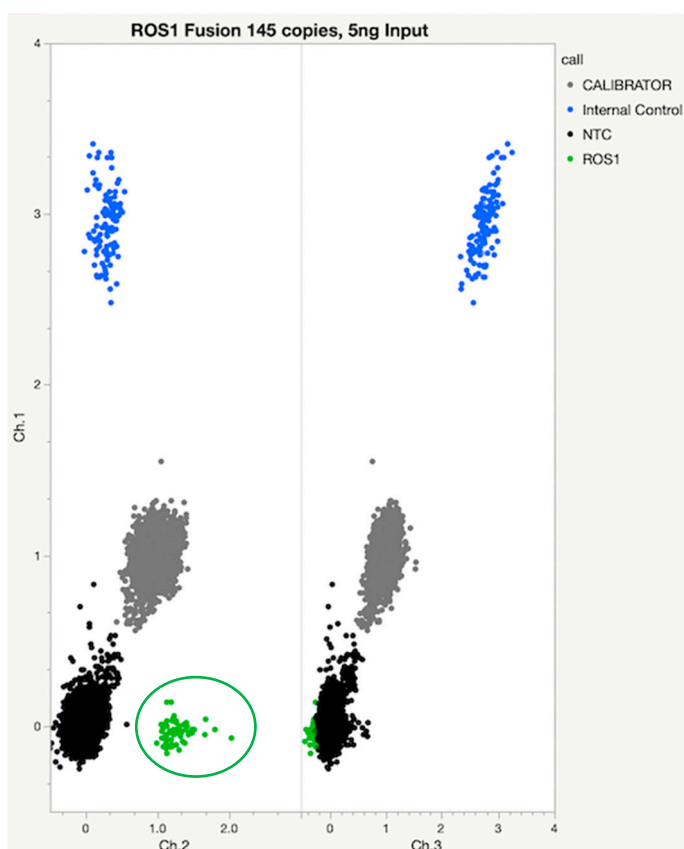

**Table S7.** Institutional Review Board Statement.

| IRB/Ethic Committee Name                       | Protocol/IRB # | Approval Date |
|------------------------------------------------|----------------|---------------|
| BioChain Institute Inc. IRB #1 -<br>Biomedical | IRB00008283    | 6/9/21        |
| Vanderbilt University IRB                      | IRB 010294     | 10/15/22      |
| Advarra IRB                                    | CR00425931     | 3/6/23        |
|                                                | Pro00051469    | 3/6/23        |
